# Supplementary material for: Dual-mode optical ratiometric thermometry using Pr3+-doped NaSrGd(MoO4)3 phosphors with tunable sensitivity
Source: Royal Society of Chemistry journal article supplement (doi:10.1039/d3dt03242f), 2023-01-01
Supplement: d3dt03242f1.pdf [file d3dt03242f1.pdf]

## **Electronic supplementary information**

**Dual-mode optical ratiometric thermometry using Pr<sup>3+</sup>-doped NaSrGd(MoO<sub>4</sub>)<sub>3</sub>**

**phosphors with tunable sensitivity**

**Zein El Abidine Aly Taleb<sup>1</sup>, Kamel Saidi\*<sup>1</sup>, Mohamed. Dammak<sup>1</sup>**

<sup>1</sup> Applied Physics Laboratory, Luminescent Materials Group, Faculty of Sciences of Sfax,  
Department of Physics, University of Sfax, BP, 1171 Sfax, Tunisia.

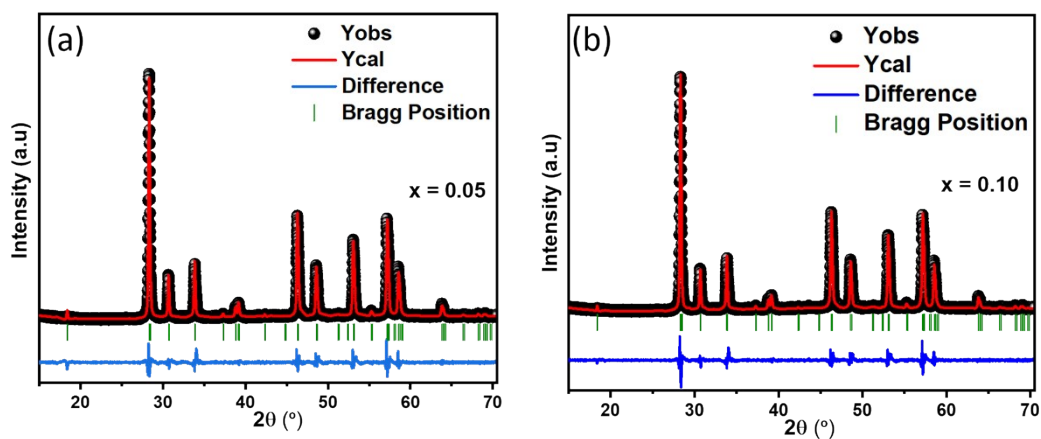

Fig.S1. a and b. Rietveld refinement patterns of NSGM:  $x\text{Pr}^{3+}$  ( $x = 0.05$  and  $x = 0.10$ ).

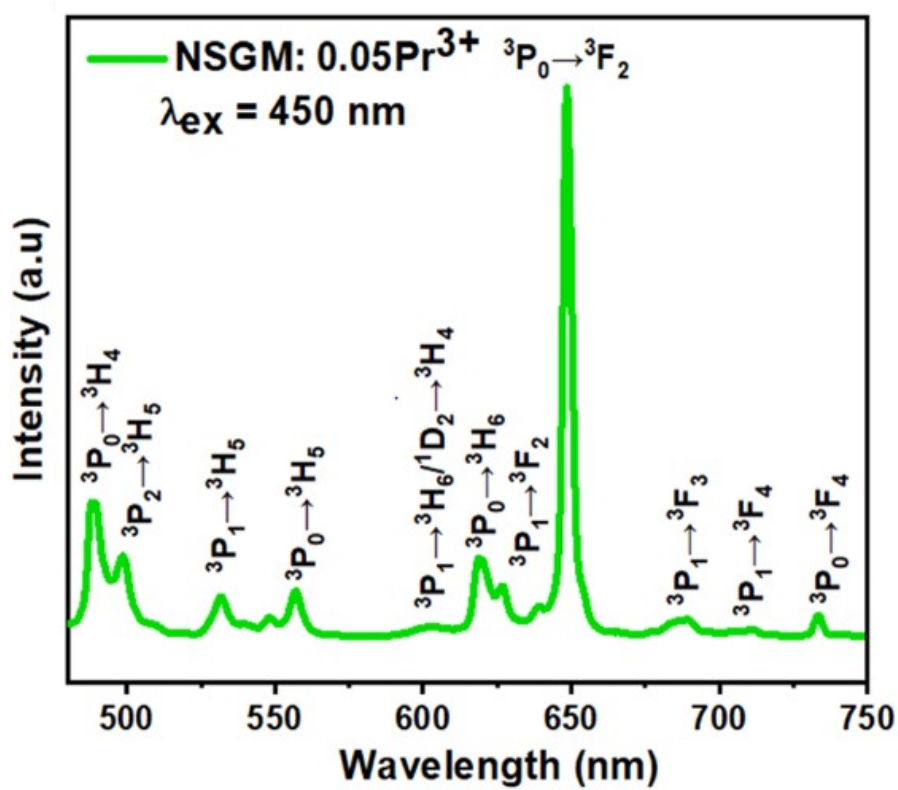

Fig.S2. Emission spectra measured at  $\lambda_{\text{ex}} = 450$  nm excitation of NSGM:  $0.05\text{Pr}^{3+}$ .

**Table.S1.** Refinement parameters of NSGM:  $x\text{Pr}^{3+}$  ( $x = 0.05$  and  $x = 0.10$ ) phosphors.

| Compound                  | NSGM: $0.05\text{Pr}^{3+}$ | NSGM: $0.10\text{Pr}^{3+}$ |
|---------------------------|----------------------------|----------------------------|
| Crystal system            | Tetragonal                 | Tetragonal                 |
| Space group               | $I4_1/a$ (88)              | $I4_1/a$ (88)              |
| a & b (Å)                 | 5.2966                     | 5.2969                     |
| c (Å)                     | 11.6563                    | 11.6566                    |
| $\alpha = \beta = \gamma$ | $90^\circ$                 | $90^\circ$                 |
| V (Å <sup>3</sup> )       | 327.0050                   | 327.0509                   |
| Rwp, %                    | 16.7                       | 15.5                       |
| $\chi^2$                  | 2.65                       | 2.50                       |

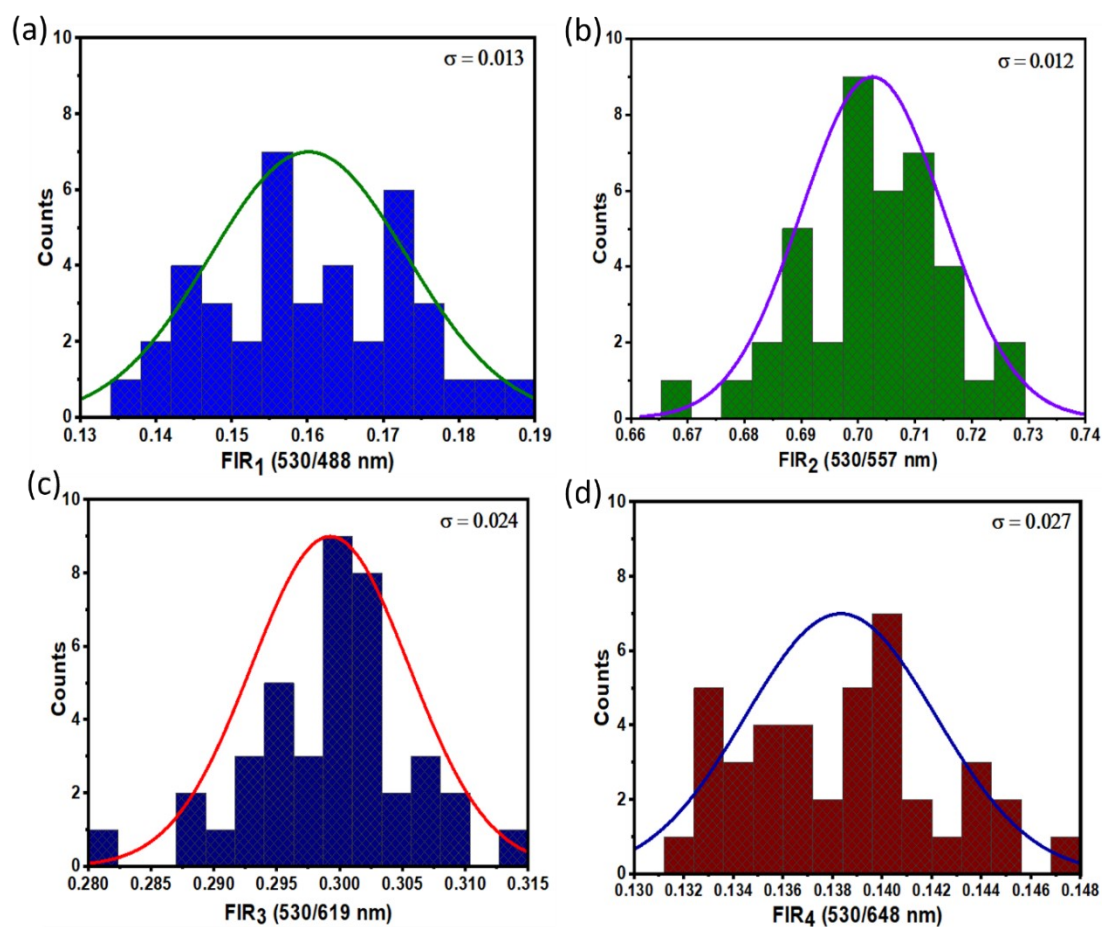

**Fig.S3.a-d.** Standard deviations at RT corresponding to (a) FIR<sub>1</sub> (530/488), (b) FIR<sub>2</sub> (530/557), (c) FIR<sub>3</sub> (530/619) and FIR<sub>4</sub> (530/648) for NSGM: 0.05Pr<sup>3+</sup> obtained using 40 measurements at 300 K.

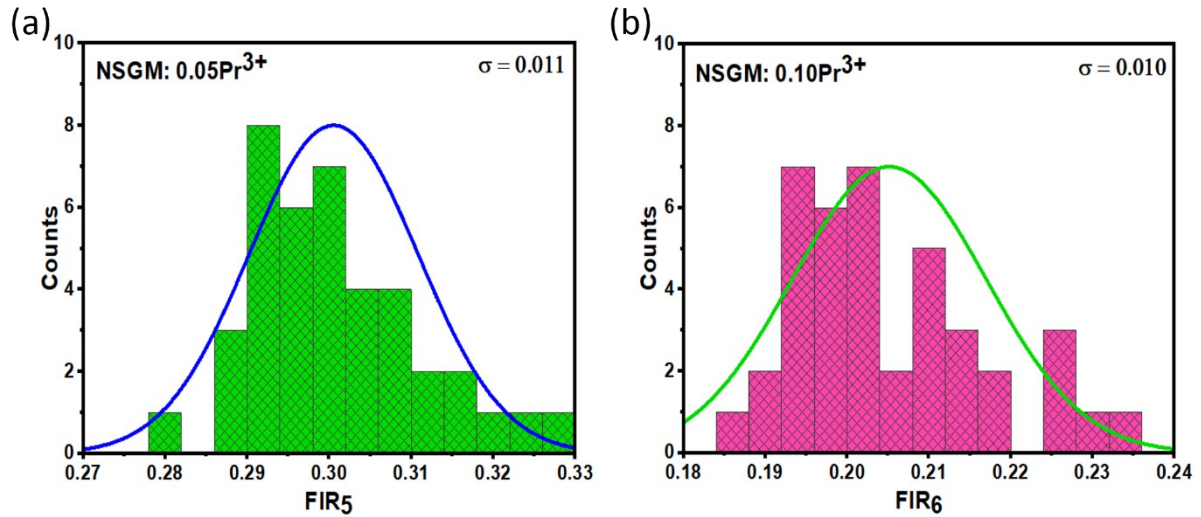

**Fig.S4.a and b.** Standard deviations at RT for (a) FIR<sub>5</sub> and (b) FIR<sub>6</sub>, based on SBR obtained using 40 measurements at 300 K for NSGM doped 5%Pr<sup>3+</sup> and 10%Pr<sup>3+</sup>, respectively.

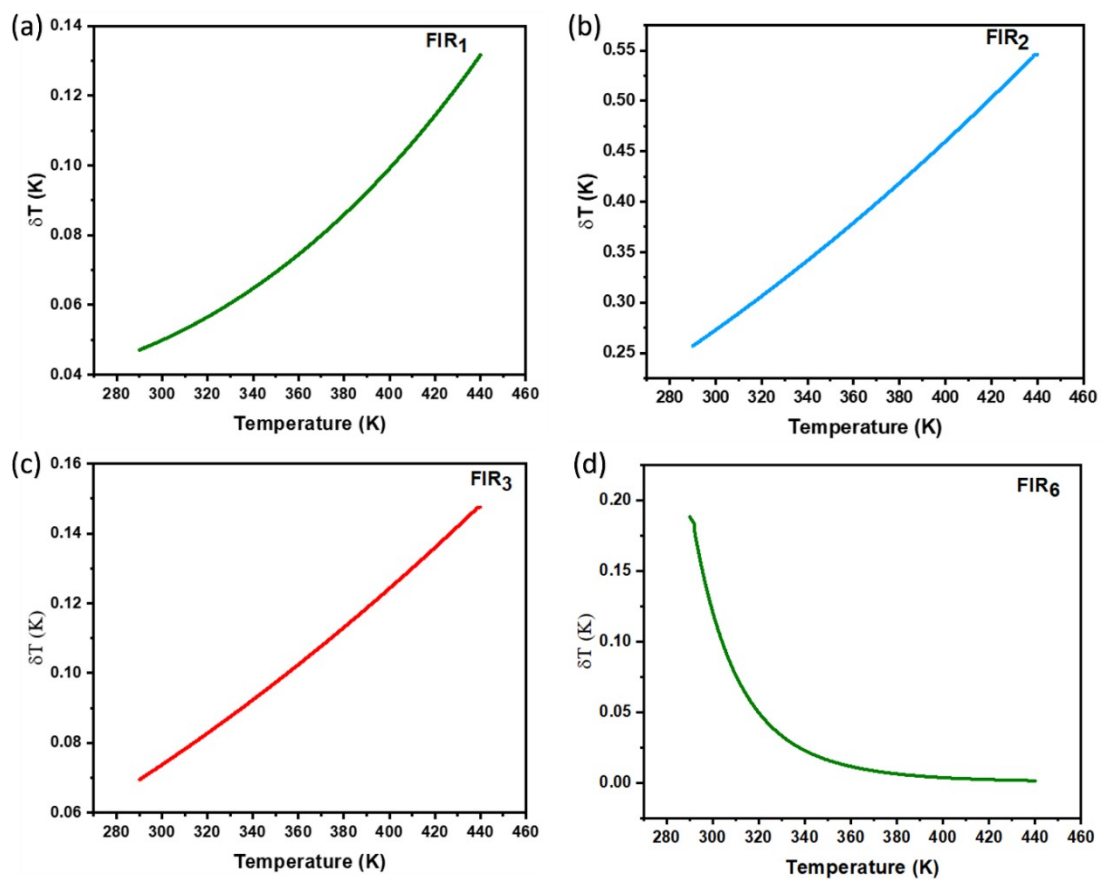

**Fig.S5.a-d.** Temperature resolution values  $\delta T$ , corresponding to (a) FIR<sub>1</sub> (530/488),

(b)  $\text{FIR}_2$  (530/557), (c)  $\text{FIR}_3$  (530/619) based on FIR-technique and for NSGM:  $0.05\text{Pr}^{3+}$  and  $\text{FIR}_6$  for NSGM:  $0.10\text{Pr}^{3+}$  based on SBR.

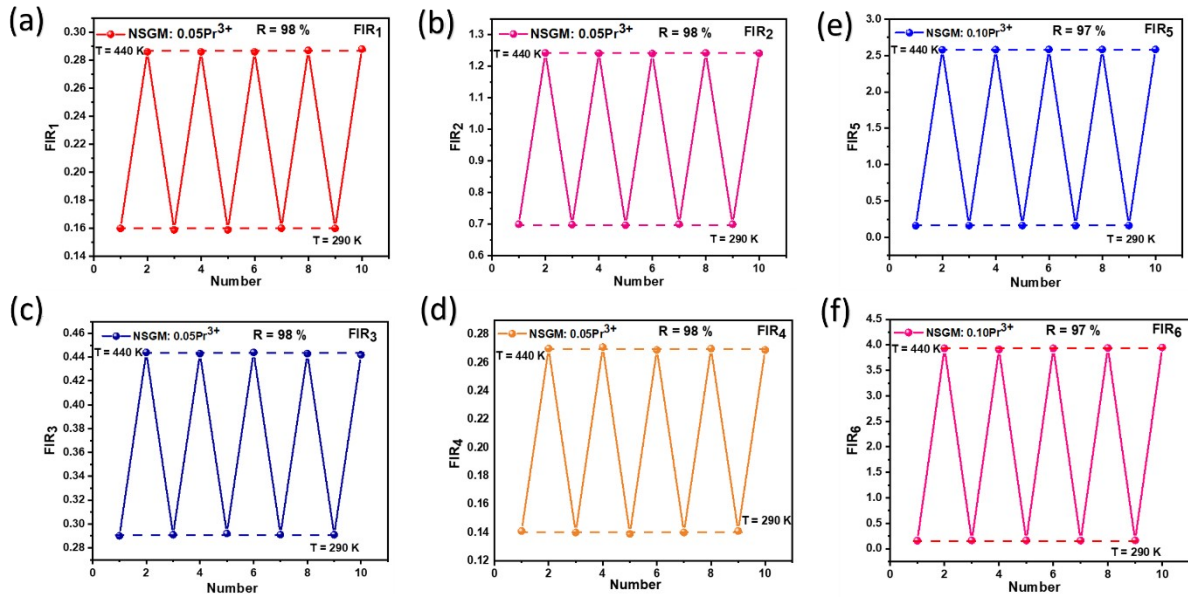

**Fig.S.6.** Repeatability assessment (R) (a-d) for NSGM:  $0.05\text{Pr}^{3+}$  and (e-f) for NSGM:  $0.10\text{Pr}^{3+}$ .
